# Supplementary material for: Photochemical control of membrane raft organization
Source: Royal Society of Chemistry journal article supplement (doi:10.1039/c0sm00797h), 2010-10-09
Supplement: c0sm00797h.pdf [file c0sm00797h.pdf]

## **Photochemical control of membrane raft organization**

**Tsutomu Hamada, Ryoko Sugimoto, Takeshi Nagasaki, Masahiro Takagi**

### **Movie files:**

1. Reversible photo-switching in membrane lateral segregation between one-phase and two-phase states, corresponding to Fig. 2a.

.mpg (1.03MB)

2. Reversible photo-switching in the production of additional lateral domains within a two-phase bilayer, corresponding to Fig. 2d.

.mpg (1.24MB)

The movies shown are in real speed.

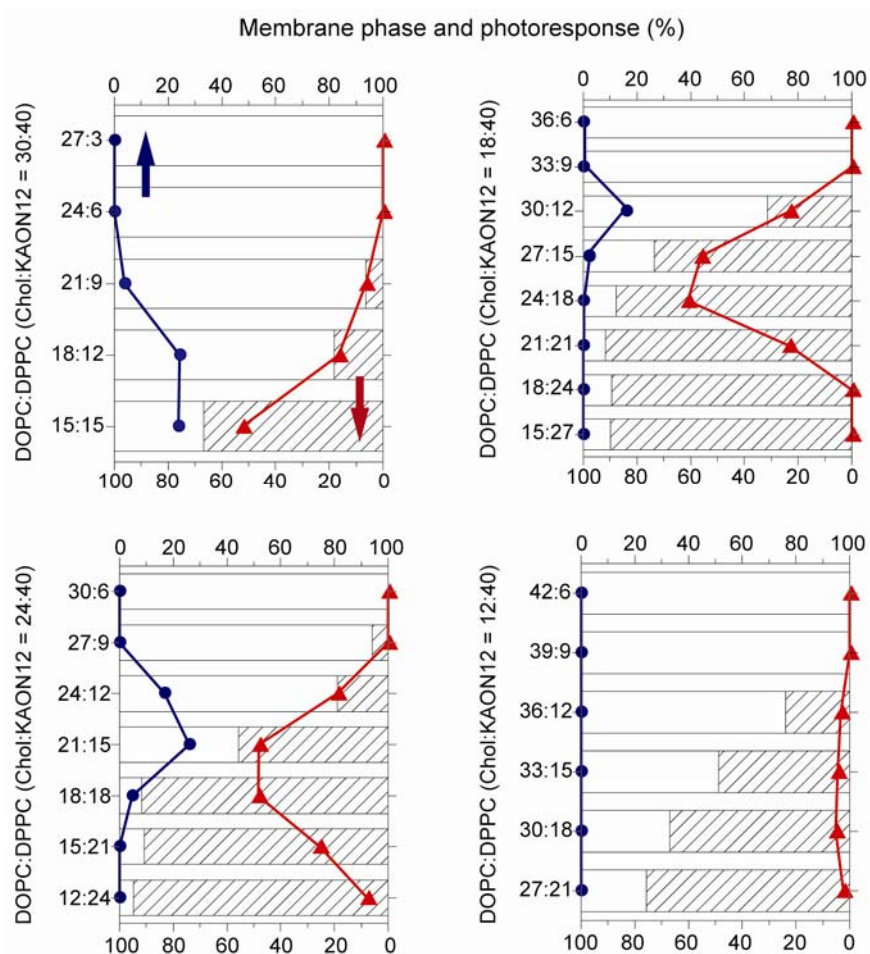

**Fig. S-1.** Percentage of membrane phase and photoresponse for each membrane composition. White and dashed boxes indicate one-phase and two-phase vesicles with trans-KAON12, respectively. Blue circles and lines correspond to photoresponsive membranes among one-phase trans-membranes, as shown in Fig. 2a-c. Red triangles and lines correspond to photoresponsive membranes among two-phase trans-membranes, as shown in Fig. 2d, e. The sum of both photoresponsive membranes is shown as photoresponsiveness in Fig. 3 b-e.

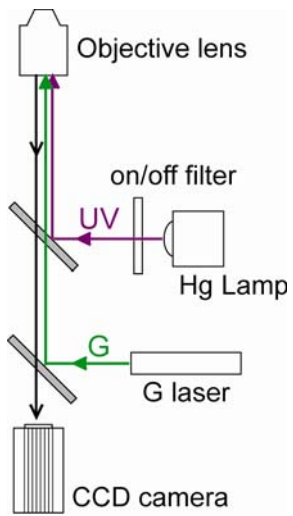

**Fig. S-2.** Microscope setup for the photoirradiation of membranes.

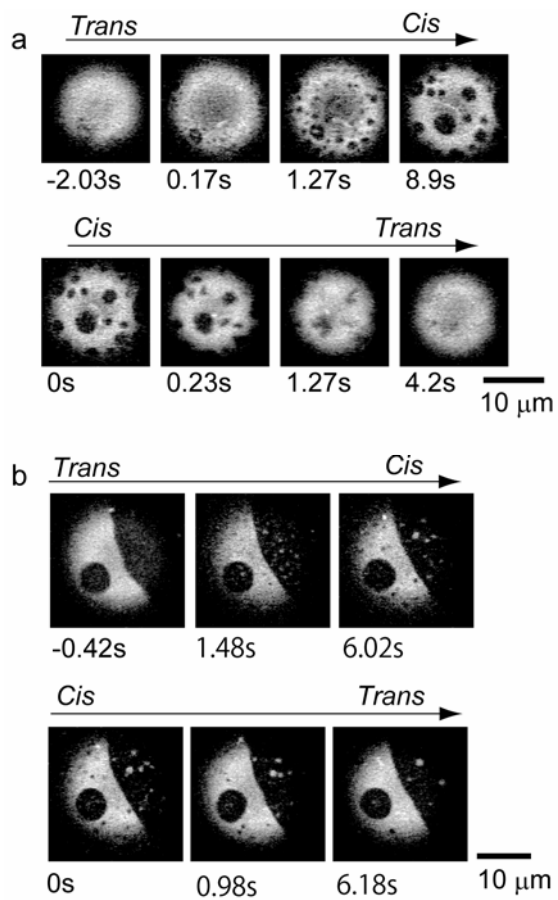

**Fig. S-3.** Typical photomicrographs of photo-induced reversible membrane phase organization. The vesicles are composed of DOPC:DPPC:Chol:KAON12 = 21:9:30:40 (a) and 21:15:24:40 (b).
